# Supplementary material for: Flexible phosphonium and sulfonate pair-to-pair self-assembled ionic organic single crystals for iodine capture
Source: Royal Society of Chemistry journal article supplement (doi:10.1039/d5sc02039e), 2025-01-01
Supplement: d5sc02039e1.pdf [file d5sc02039e1.pdf]

## Supporting information for

### Flexible phosphonium and sulfonate pair-to-pair self-assembled ionic organic single crystals for iodine capture

Mingxia Sun <sup>a, b</sup>, Jia Chen <sup>\*, a, b</sup>, Ting Zhang <sup>a</sup>, Wei Xu <sup>a, b</sup>, Jing He <sup>a, b</sup>, Yunyun Zhang <sup>a, b</sup>, Huifeng Liu <sup>a</sup>, Shuang Zhang <sup>a</sup>, Juanjuan Wang <sup>a</sup>, Xin Li <sup>a</sup>, Yali Yang <sup>a</sup>, Hongdeng Qiu <sup>\*, a, b, c</sup>

#### AUTHOR ADDRESS

<sup>a</sup> CAS Key Laboratory of Chemistry of Northwestern Plant Resources and Key Laboratory for Natural Medicine of Gansu Province, Lanzhou Institute of Chemical Physics, Chinese Academy of Sciences, Lanzhou 730000, China

<sup>b</sup> University of Chinese Academy of Sciences, Beijing 100049, China

<sup>c</sup> Key Laboratory of Rare Earths, Ganjiang Innovation Academy, Chinese Academy of Sciences, Ganzhou 341000, China

\* E-mail: jiachen@licp.cas.cn (J. Chen); hdqiu@licp.cas.cn (H. Qiu).

# CONTENT

|                                                                                                                                                                                                              |     |
|--------------------------------------------------------------------------------------------------------------------------------------------------------------------------------------------------------------|-----|
| Reagent and apparatus.....                                                                                                                                                                                   | S4  |
| Details of adsorption performance of iodine in iodine-cyclohexane .....                                                                                                                                      | S5  |
| Details of adsorption performance of iodine vapor .....                                                                                                                                                      | S5  |
| Details of DFT calculations.....                                                                                                                                                                             | S6  |
| Figure S1. Schematic diagram of plane angle of benzene rings of PEBT and PBBT in four IOCs of (a) PEBT-NDS, (b) PEBT-PTS, (c) PBBT-PTS, (d) PBBT-BDS.....                                                    | S7  |
| Figure S2. Schematic diagram of bond angle of alkyl chain of PEBT and PBBT in four IOCs of (a) PEBT-NDS, (b) PEBT-PTS, (c) PBBT-PTS, (d) PBBT-BDS.....                                                       | S8  |
| Figure S3. Schematic diagram of topological structure of four IOCs of (a) PEBT-NDS, (b) PEBT-PTS, (c) PBBT-PTS, (d) PBBT-BDS.....                                                                            | S9  |
| Figure S4. Schematic diagram of ionic bond length of four IOCs of (a) PEBT-NDS, (b) PEBT-PTS, (c) PBBT-PTS, (d) PBBT-BDS.....                                                                                | S10 |
| Figure S5. TGA curve of four IOCs of (a) PEBT-NDS, (b) PEBT-PTS, (c) PBBT-PTS, (d) PBBT-BDS.....                                                                                                             | S11 |
| Figure S6. Standard curve of iodine concentration and absorbance in iodine-cyclohexan.....                                                                                                                   | S12 |
| Figure S7. UV-Vis absorption curves of four IOCs in iodine-cyclohexane solution of (a, b) PEBT-NDS, (c, d) PEBT-PTS, (e, f) PBBT-PTS, (g, h) PBBT-BDS.....                                                   | S13 |
| Figure S8. Adsorption of iodine in different concentrations of iodine-cyclohexane belongs to the time and corresponding dynamic fitting curve of (a) PEBT-NDS, (b) PEBT-PTS, (c) PBBT-PTS, (d) PBBT-BDS..... | S14 |
| Figure S9. Photos of iodine-cyclohexane before and after adsorption of four IOCs of (a) PEBT-NDS, (b) PEBT-PTS, (c) PBBT-PTS, (d) PBBT-BDS.....                                                              | S15 |
| Figure S10. Photos of four IOCs before and after iodine vapor adsorption of (a) PEBT-NDS, (b) PEBT-PTS, (c) PBBT-PTS, (d) PBBT-BDS.....                                                                      | S16 |
| Figure S11. Iodine adsorption in iodine vapor belongs to the time at 70 °C and their corresponding dynamic fitting curve of (a) PEBT-NDS, (b) PEBT-PTS, (c) PBBT-PTS, (d) PBBT-BDS.....                      | S17 |
| Figure S12. Photos of four IOCs before and after iodine release in cyclohexane of (a) PEBT-NDS, (b) PEBT-PTS, (c) PBBT-PTS, (d) PBBT-BDS.....                                                                | S18 |
| Figure S13. UV-Vis absorption curves of release in cyclohexane of (a) PEBT-NDS, (b) PEBT-PTS, (c) PBBT-PTS, (d) PBBT-BDS.....                                                                                | S19 |
| Figure S14. Photos of solubility of four IOCs in different solvents at 70 °C.....                                                                                                                            | S20 |
| Figure S15. TGA curve of four IOCs before and after iodine adsorption of (a) PEBT-NDS, (b) PEBT-PTS, (c) PBBT-PTS, (d) PBBT-BDS.....                                                                         | S21 |
| Figure S16. UV-Vis absorption curves of four IOCs release in cyclohexane after iodine adsorption and $I_3^-$ in water. ....                                                                                  | S22 |
| Figure S17. XPS high-resolution spectrum of four IOCs before and after iodine adsorption of (a-c) PEBT-NDS, (d-f) PEBT-PTS, (g-i) PBBT-PTS, (j-l) PBBT-BDS.....                                              | S23 |

|                                                                                                                                                                                                                                                                                  |     |
|----------------------------------------------------------------------------------------------------------------------------------------------------------------------------------------------------------------------------------------------------------------------------------|-----|
| <b>Figure S18.</b> XPS C high-resolution spectrum of four IOCs before and after iodine adsorption of (a) PEBT-NDS, (b) PEBT-PTS, (c) PBBT-PTS, (d) PBBT-BDS.....                                                                                                                 | S24 |
| <b>Figure S19.</b> Element distribution mapping of four IOCs. ....                                                                                                                                                                                                               | S25 |
| <b>Figure S20.</b> Element distribution mapping of four IOCs after iodine adsorption. ....                                                                                                                                                                                       | S26 |
| <b>Figure S21.</b> The lowest energy configurations, adsorption energies, and distances of (a-c) ring 1 of PEBT, ring 2 and O of NDS on $I_2$ sites, (d-f) ring 1 of PEBT, ring 2 and O of NDS on $I_3^-$ sites, (g-h) ring 1 of PEBT, ring 2 and O of NDS on $I_5^-$ sites..... | S27 |
| <b>Figure S22.</b> Charge transfer diagrams of (a-c) ring 1 of PEBT, ring 2 and O of NDS on $I_2$ sites, (d-f) ring 1 of PEBT, ring 2, and O of NDS on $I_3^-$ sites, (g-h) ring 1, ring 2, and O of NDS on $I_5^-$ sites. ....                                                  | S28 |
| <b>Table S1.</b> Preparation parameters of four IOCs.....                                                                                                                                                                                                                        | S29 |
| <b>Table S2.</b> Unit cell packing of four IOCs.....                                                                                                                                                                                                                             | S30 |
| <b>Table S3.</b> Plane angle of benzene rings of PEBT and PBBT in four IOCs. ....                                                                                                                                                                                                | S31 |
| <b>Table S4.</b> Solubleness of four IOCs in different solvents at 70 °C.....                                                                                                                                                                                                    | S32 |
| <b>Table S5.</b> EDS data of four IOCs.....                                                                                                                                                                                                                                      | S33 |
| <b>Table S6.</b> EDS data of four IOCs after iodine adsorption.....                                                                                                                                                                                                              | S34 |
| <b>Table S7.</b> The distance between iodine atoms.....                                                                                                                                                                                                                          | S35 |
| <b>Table S8.</b> Comparison with other reported iodine vapor adsorption properties.....                                                                                                                                                                                          | S36 |
| <b>References</b> .....                                                                                                                                                                                                                                                          | S37 |

## Reagent and apparatus

Phosphonium,1,1'-(1,2-ethanediyl)bis[1,1,1-triphenyl-, bromide](1:2) (PEBT, 98%) was purchased from Jiangsu Aikang Biomedical R&D Co., LTD (Nanjing, China); phosphonium,1,1'-(1,4-butanediyl)bis[1,1,1-triphenyl-bromide(1:2) (PBBT, 98%) and 1,5-naphthalenedisulfonic acid (NDS, 98%) were purchased from Shanghai Maclin Biochemical Technology Co., LTD (Shanghai, China); 1,3,6,8-pyrenetetrasulfonic acid, sodium salt(1:4) (PTS, 98%) and 4,4'-biphenyldisulfonic acid (BDS, 98%) were purchased from Shanghai Bide Pharmaceutical Technology Co., LTD. (Shanghai, China); Iodine purchased from Tokyo Chemical Industry Co., LTD. (Tokyo, Japan); Methanol (MeOH), cyclohexane, acetonitrile (MeCN), dimethyl formamide (DMF) and dimethylsulfoxide (DMSO) were purchased from Leanlon Bohua Pharmaceutical Chemistry Co., LTD. (Tianjin, China); Ultrapure water was produced by Milli-Q Purification Equipment (Millipore, Billerica, MA, USA).

The absorbance test of the  $I_2$  was performed on UV-3600plus UV-Visible spectrophotometer (UV-Vis) (Shimadzu Corporation, Japan); The crystallographic data of the materials were analyzed by Smart APEX II X-ray single crystal diffractometer (Bruker Corporation, Germany) and XRD-6100 X-ray diffractometer (XRD, Shimadzu Corporation, Japan). The specific surface area and pore data of samples were tested by the Quantachrome EVO automatic specific surface and porosity analyzer (Canta Instruments, USA) and calculated with the Brunauer, Emmett, and Teller (BET) equation. The appearance was measured by ML31-M optical microscope (Guangzhou Mingmei Technology Co., LTD., China). Thermogravimetric analysis (TGA) of the material was tested using the STA449F3 synchronous thermal analyzer (NETZSCH Corporation, Germany) in an air atmosphere from 25 °C to 800 °C at a heating rate of 10 °C min<sup>-1</sup>. The presence of elements on the surface of the material was analyzed on the ESCALAB 250Xi X-ray photoelectron spectrometer (Thermo Fisher Scientific, USA). Functional groups of materials were analyzed using a V70 Fourier transform infrared spectrometer (FT-IR, Bruker Corporation, Germany). The present form of iodine was tested on LabRAM HR Evolution micro confocal Raman spectrometer (HORIBA Jobin Yvon S.A.S., France). The element distribution was measured by energy dispersive spectrometer (EDS) on a SU8020 ultra-high resolution field emission scanning electron microscope (HITACHI, Japan).

### Details of adsorption performance of iodine in iodine-cyclohexane

The sample iodine adsorption capacity is calculated according to the following equation (1):

$$Q_e = (C_0 - C_t) * V \text{ m}^{-1} \quad (1)$$

where  $Q_e$  represents the adsorption capacity of the sample at time  $t$  ( $\text{mg g}^{-1}$ );

$C_0$  represents the initial concentration of iodine-cyclohexane solution ( $\text{mg L}^{-1}$ );

$C_t$  represents the concentration of iodine-cyclohexane solution ( $\text{mg L}^{-1}$ ) at time  $t$ ;

$V$  represents the volume (L) of the iodine-cyclohexane solution;

$m$  represents the mass (g) of the IOCs.

Quasi-first-order kinetic model is fitted according to the following equation (2)<sup>1</sup>

$$Q_t = Q_e * (1 - e^{-k_1 t}) \quad (2)$$

where  $Q_t$  represents the adsorption capacity at time  $t$  ( $\text{mg g}^{-1}$ );

$Q_e$  represents the adsorption capacity at equilibrium ( $\text{mg g}^{-1}$ );

$k_1$  stands for quasi-first-order adsorption rate constant ( $\text{min}^{-1}$ );

$t$  is the adsorption time.

Quasi-second-order kinetic model is fitted according to the following equation (3)<sup>1</sup>

$$Q_t = k_2 Q_e^2 t / (1 + k_2 Q_e t) \quad (3)$$

where  $Q_t$  represents the adsorption capacity at time  $t$  ( $\text{mg g}^{-1}$ );

$Q_e$  represents the adsorption capacity at equilibrium ( $\text{mg g}^{-1}$ );

$k_2$  represents the quasi-second-order adsorption rate constant ( $\text{g mg}^{-1} \text{ min}$ );

$t$  is the adsorption time.

### Details of adsorption performance of iodine vapor

The sample iodine adsorption capacity is calculated according to the following equation (4)<sup>2</sup>

$$Q_t = 1000 * (m_2 - m_1) / m_1 \quad (4)$$

$m_2$  represents the adsorption capacity of the sample at time  $t$  ( $\text{mg/g}$ );

$m_1$  and  $m_2$  represent the mass (g) of the IOCs before and after iodine adsorption, respectively.

## Details of DFT calculations

The calculations were conducted using the Vienna ab initio simulation package (VASP v6.2.1)<sup>3-5</sup> and the Perdew-Burke-Ernzerhof variant of the Generalized Gradient Approximation (GGA-PBE)<sup>6</sup> functional was employed to obtain the exchange and correlation terms. To capture long-range vdW, the DFT-D3(BJ) approach by Grimme was utilized<sup>7, 8</sup>.

For the structural refinement and associated computations, an energy threshold of 400 eV was applied, and a k-mesh 1\*1\*1 was adopted to ensure convergence of energy to 1\*10<sup>-5</sup> eV and forces to 0.02 eV Å<sup>-1</sup>. The optimized lattice dimensions were determined to be 27.00 Å\*27.00 Å\*27.00 Å, with the angles  $\alpha$ ,  $\beta$ , and  $\gamma$  at 98.1°, 93.2°, and 107.0°, respectively. The charge density discrepancy, indicated by  $\Delta\rho$ , was computed by subtracting the charge density of the bare slab ( $\rho_{\text{slab}}$ ) and the gas-phase molecules ( $\rho_{\text{molecule}}$ ) from the total charge density of the slab with adsorbed molecules ( $\rho_{\text{molecule@slab}}$ ), as expressed by the equation (5):

$$\Delta\rho = \rho_{\text{molecule@slab}} - \rho_{\text{slab}} - \rho_{\text{molecule}} \quad (5)$$

The analysis of charge transfer between the adsorbates and the surface was conducted through the application of Bader charge analysis.<sup>9</sup>

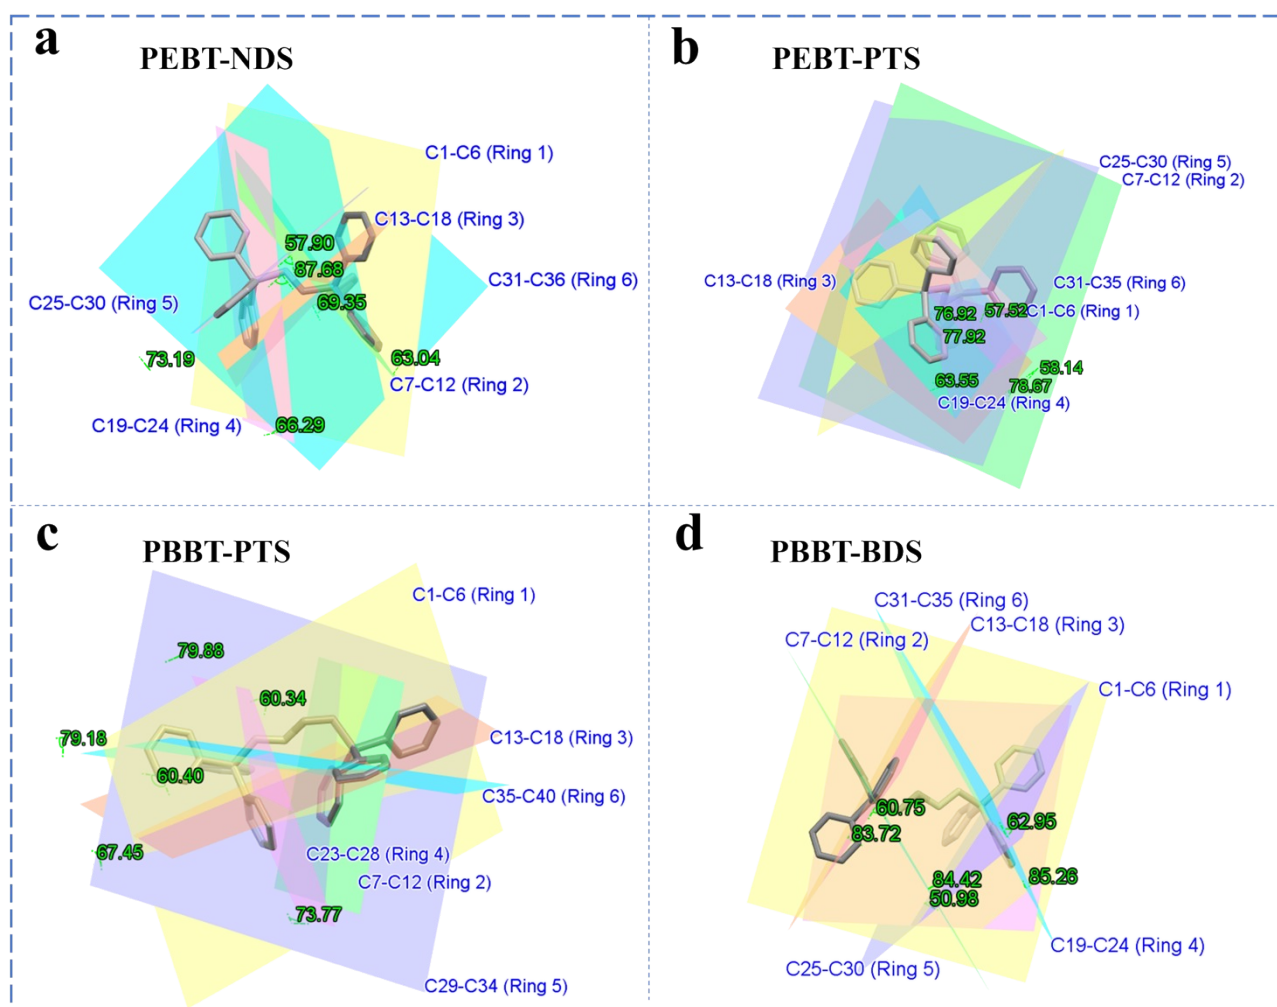

**Figure S1.** Schematic diagram of plane angle of benzene rings of PEBT and PBBT in four IOCs of (a) PEBT-NDS, (b) PEBT-PTS, (c) PBBT-PTS, (d) PBBT-BDS.

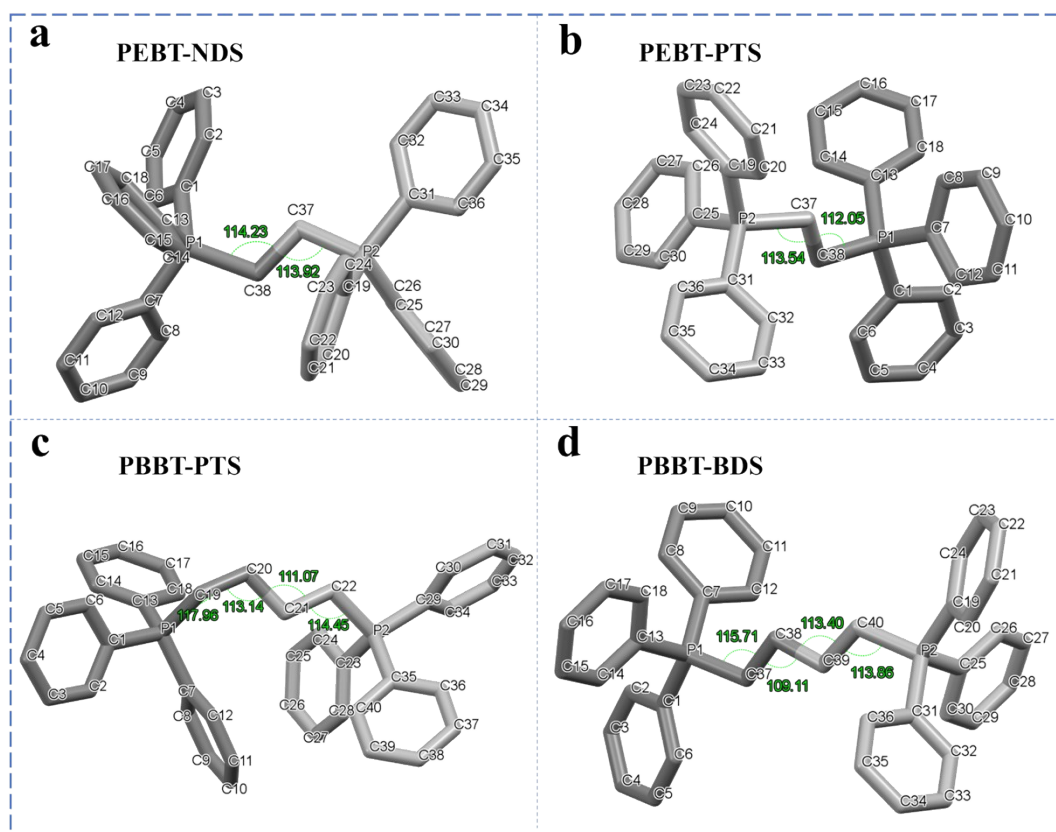

**Figure S2.** Schematic diagram of bond angle of alkyl chain of PEBT and PBBT in four IOCs of (a) PEBT-NDS, (b) PEBT-PTS, (c) PBBT-PTS, (d) PBBT-BDS.



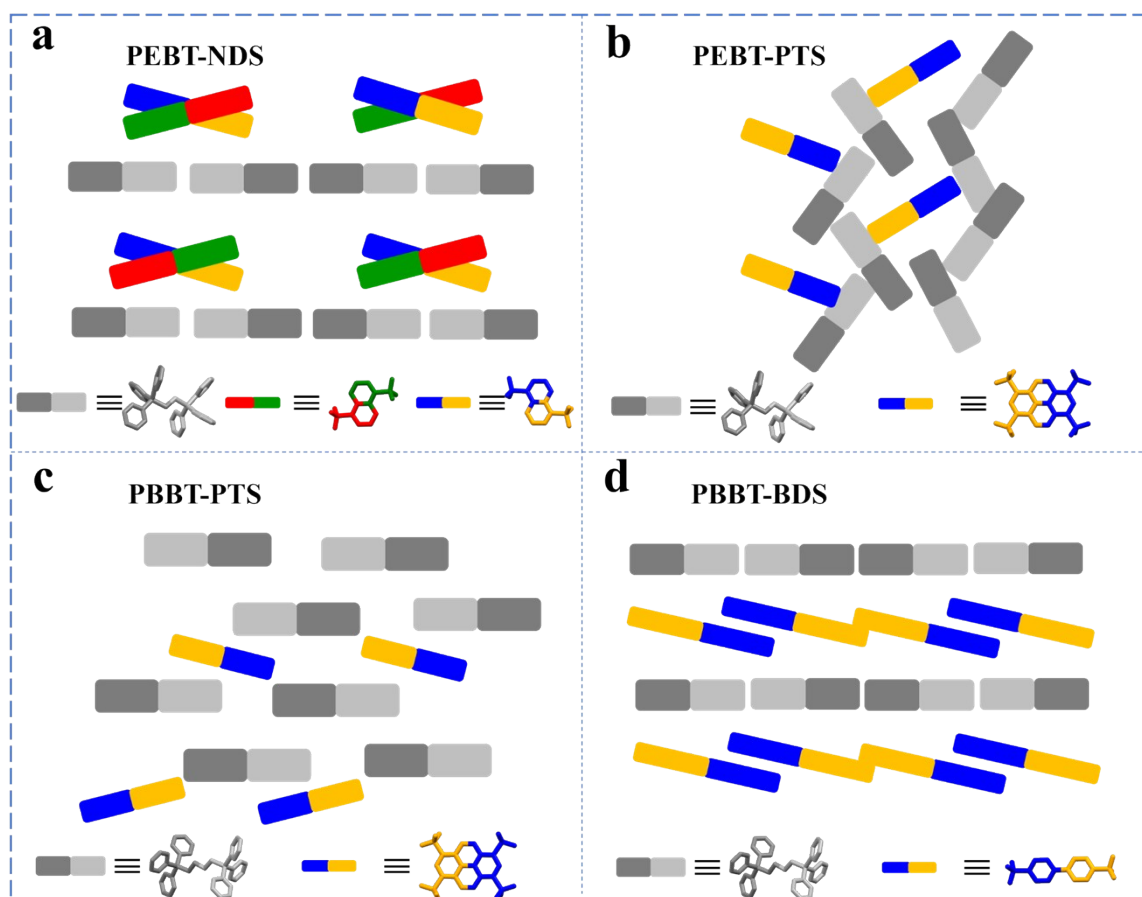

**Figure S3.** Schematic diagram of topological structure of four IOCs of (a) PEBT-NDS, (b) PEBT-PTS, (c) PBBT-PTS, (d) PBBT-BDS.

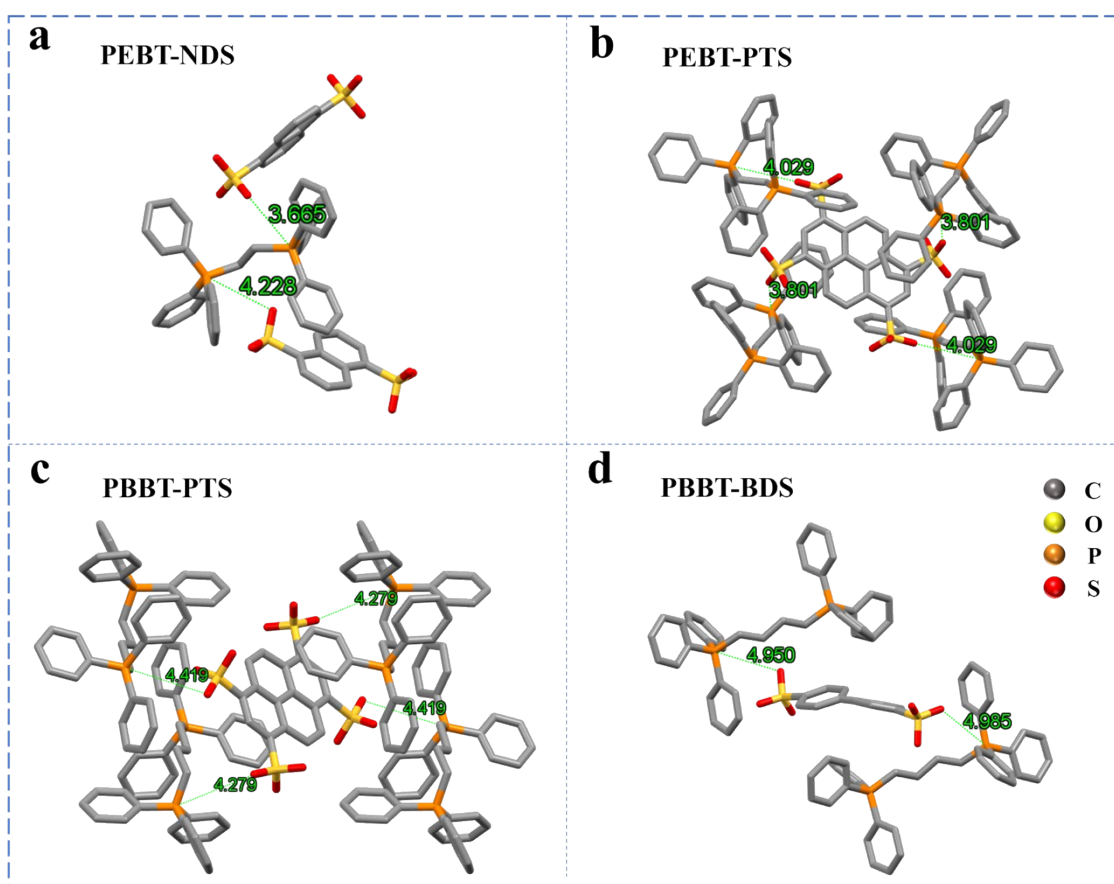

**Figure S4.** Schematic diagram of ionic bond length of four IOCs of (a) PEBT-NDS, (b) PEBT-PTS, (c) PBBT-PTS, (d) PBBT-BDS.

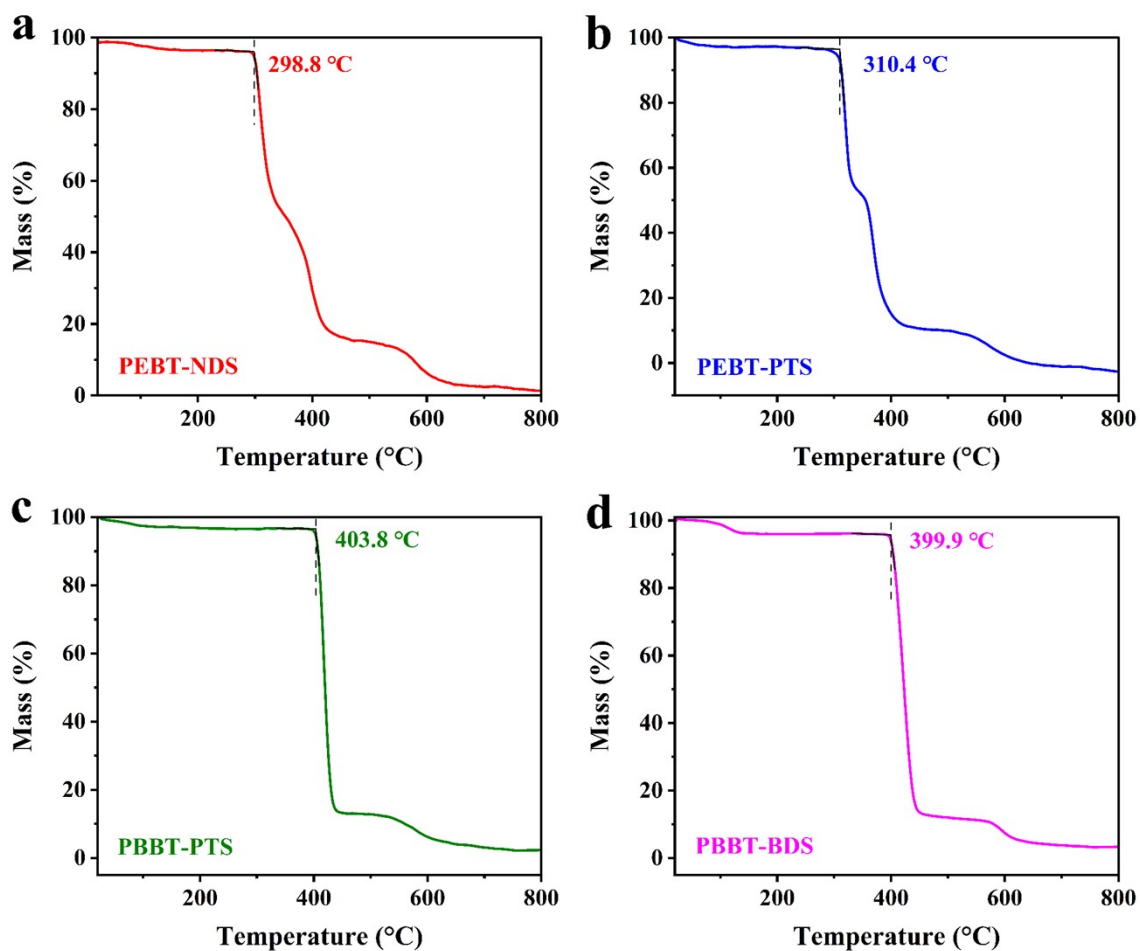

**Figure S5.** TGA curve of four IOCs of (a) PEBT-NDS, (b) PEBT-PTS, (c) PBBT-PTS, (d) PBBT-BDS.

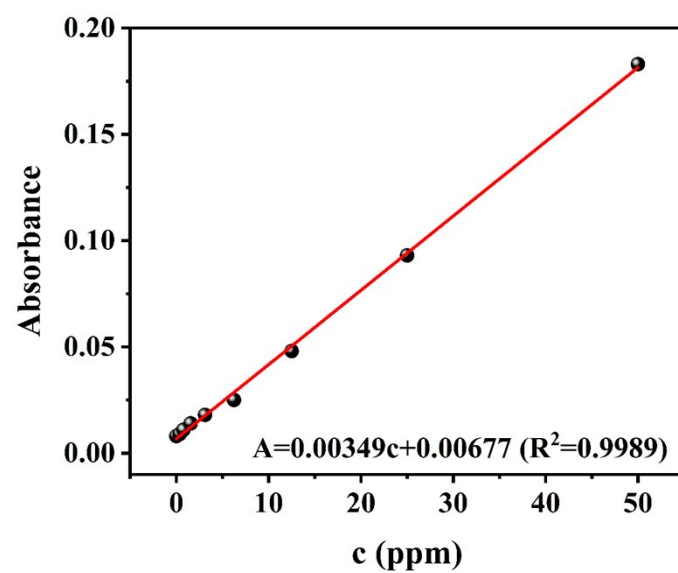

**Figure S6.** Standard curve of iodine concentration and absorbance in iodine-cyclohexane solution.

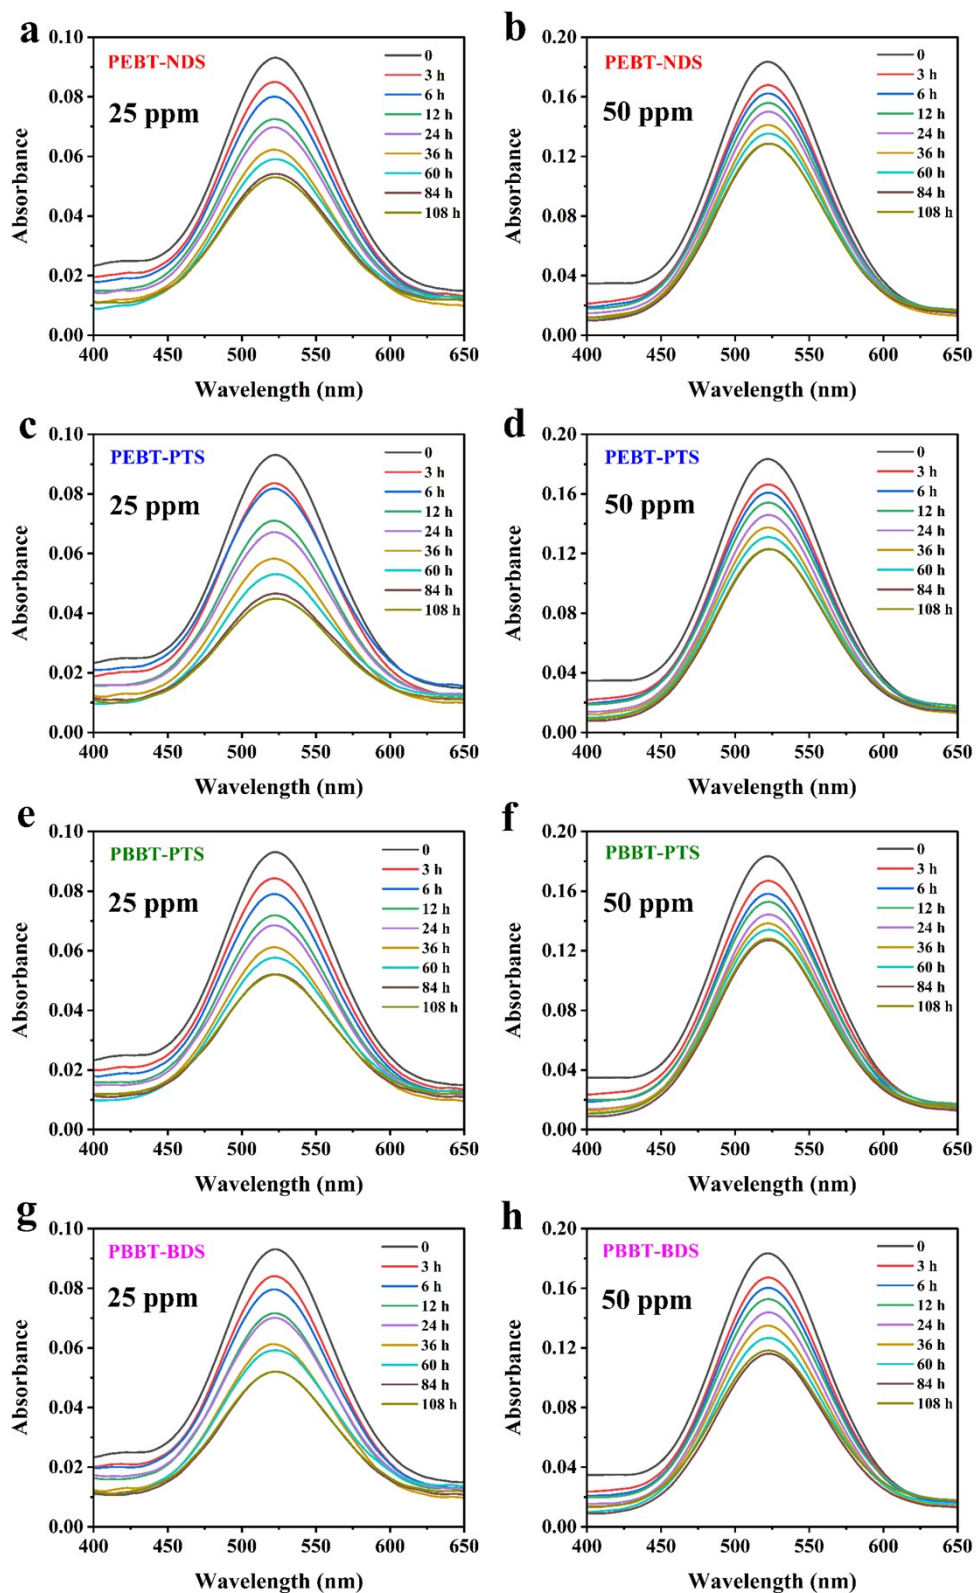

**Figure S7.** UV-Vis absorption curves of four IOCs in iodine-cyclohexane solution of (a, b) PEBT-NDS, (c, d) PEBT-PTS, (e, f) PBBT-PTS, (g, h) PBBT-BDS.

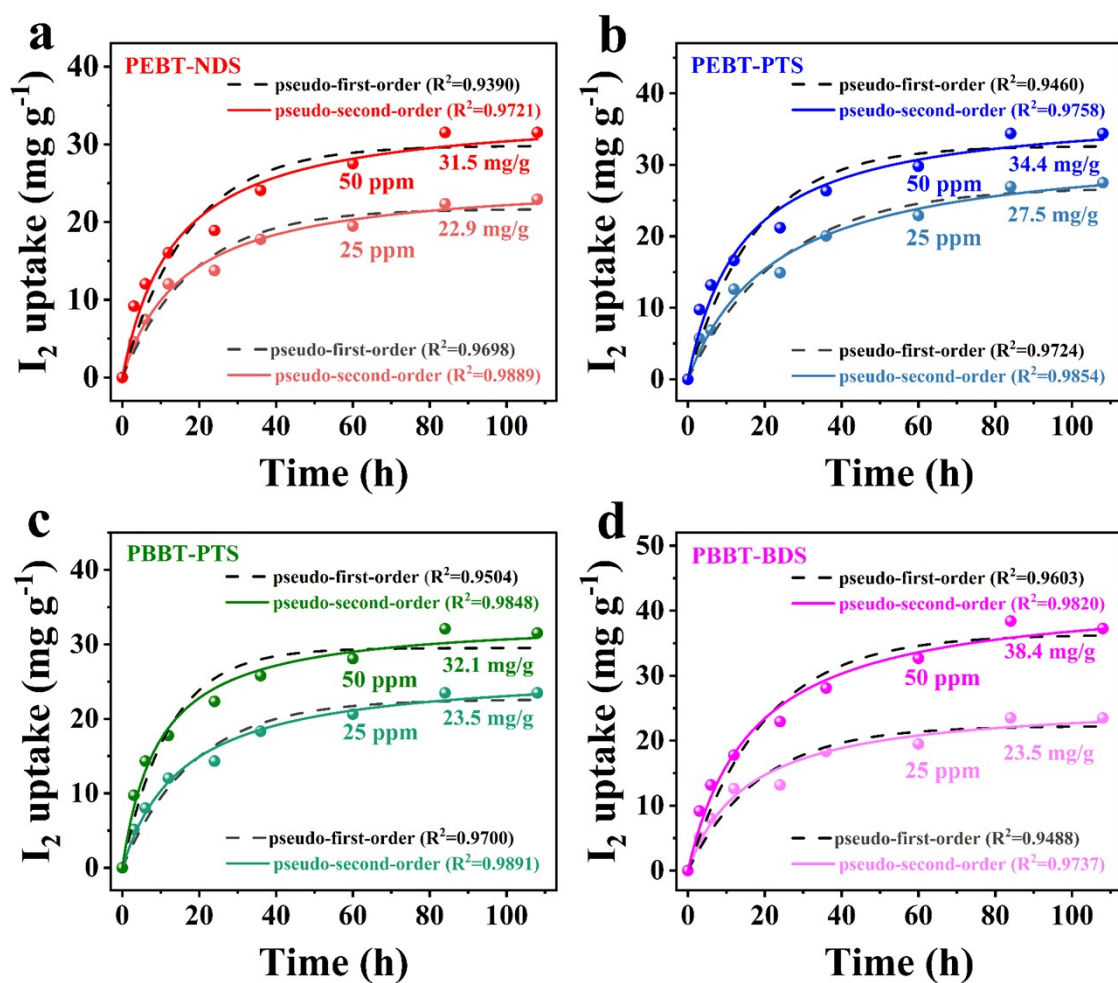

**Figure S8.** Adsorption of iodine in different concentrations of iodine-cyclohexane belongs to the time and corresponding dynamic fitting curve of (a) PEBT-NDS, (b) PEBT-PTS, (c) PBBT-PTS, (d) PBBT-BDS.

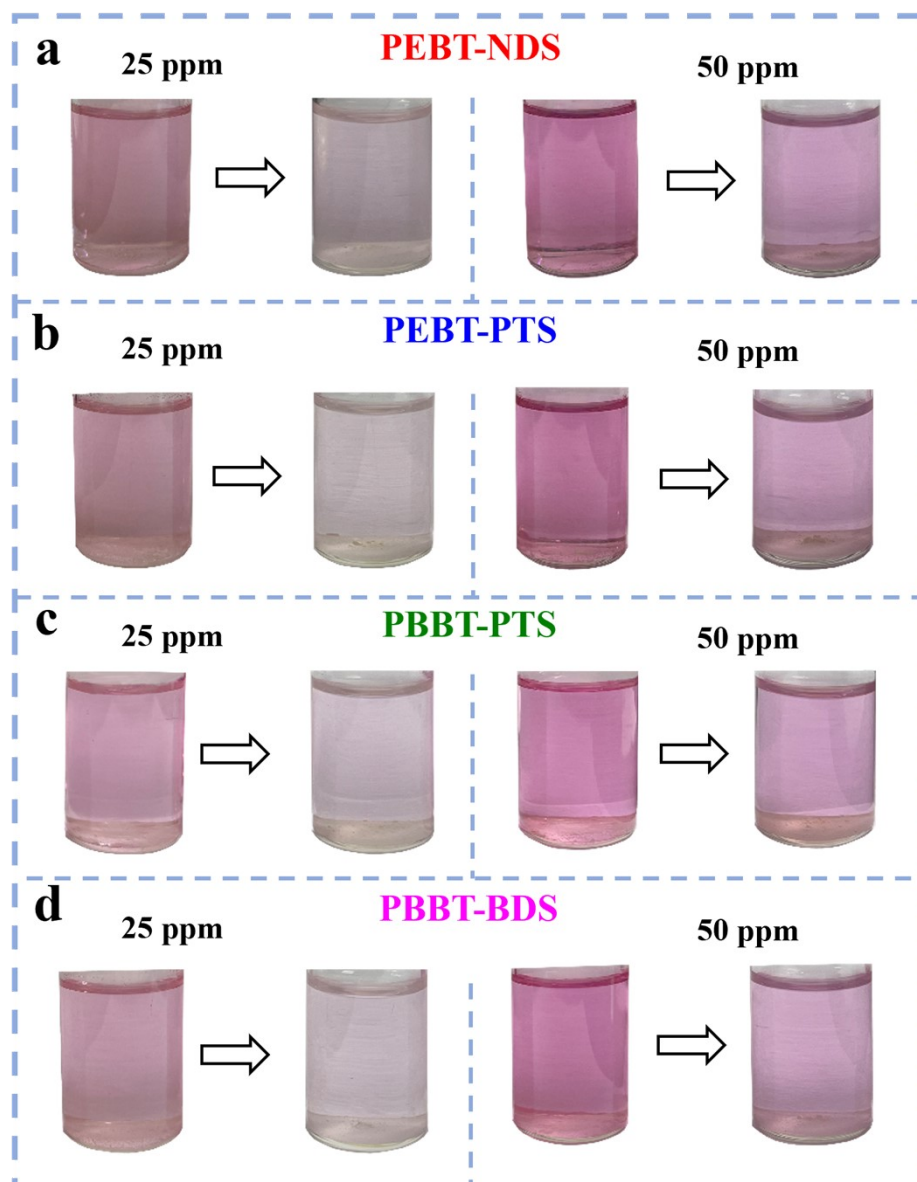

**Figure S9.** Photos of iodine-cyclohexane before and after adsorption of four IOCs of (a) PEBT-NDS, (b) PEBT-PTS, (c) PBBT-PTS, (d) PBBT-BDS.



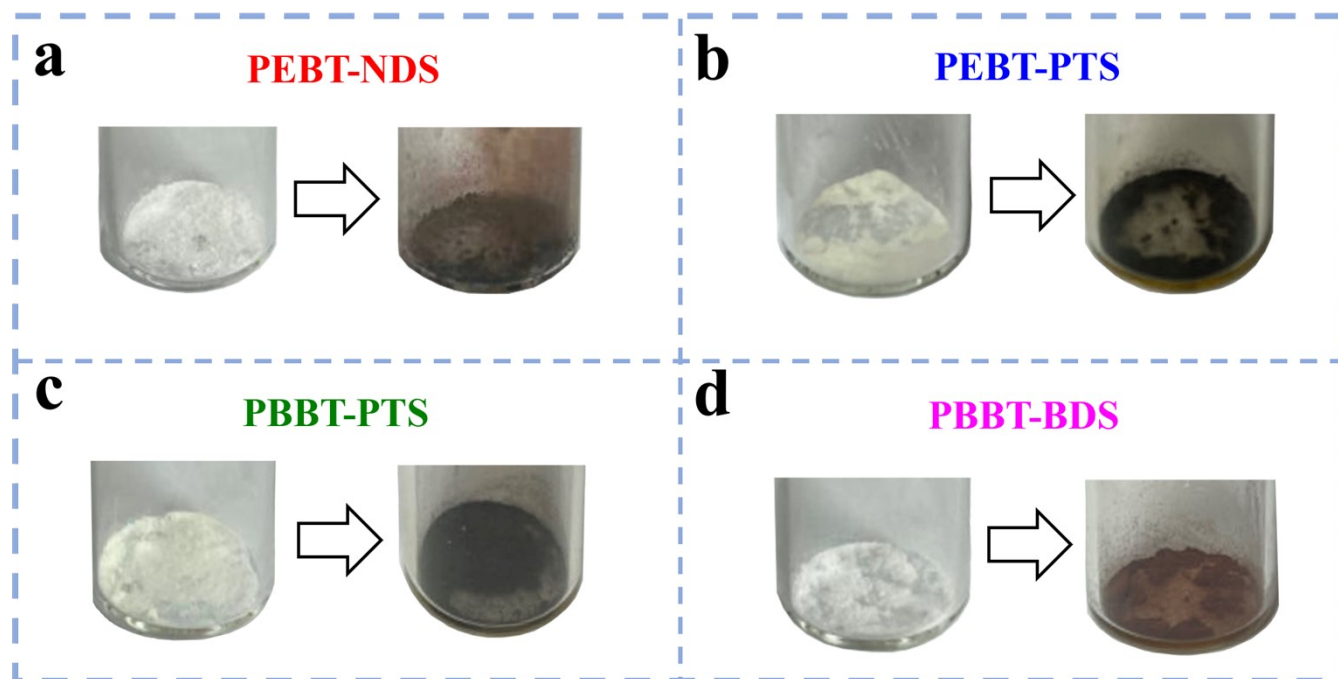

**Figure S10.** Photos of four IOCs before and after iodine vapor adsorption of (a) PEBT-NDS, (b) PEBT-PTS, (c) PBBT-PTS, (d) PBBT-BDS.



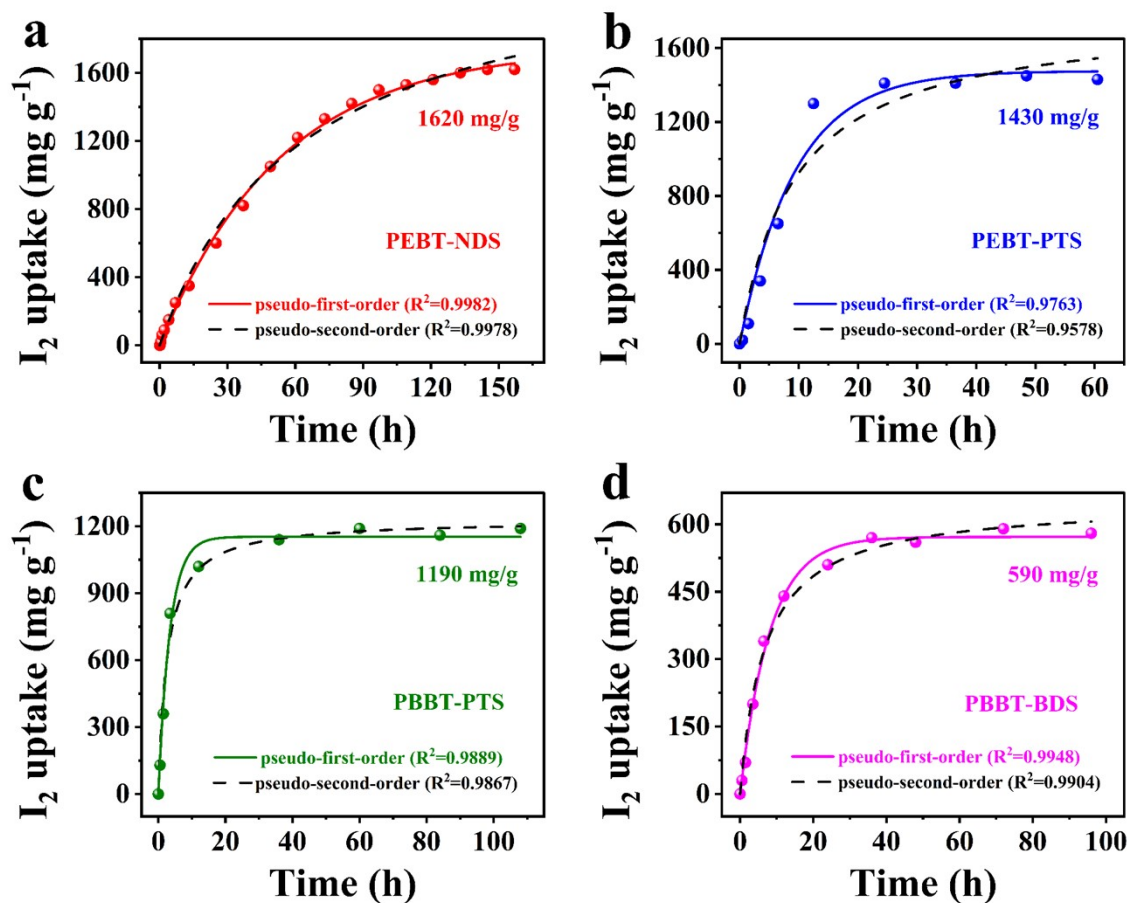

**Figure S11.** Iodine adsorption in iodine vapor belongs to the time at 70 °C and their corresponding dynamic fitting curve of (a) PEBT-NDS, (b) PEBT-PTS, (c) PBBT-PTS, (d) PBBT-BDS.

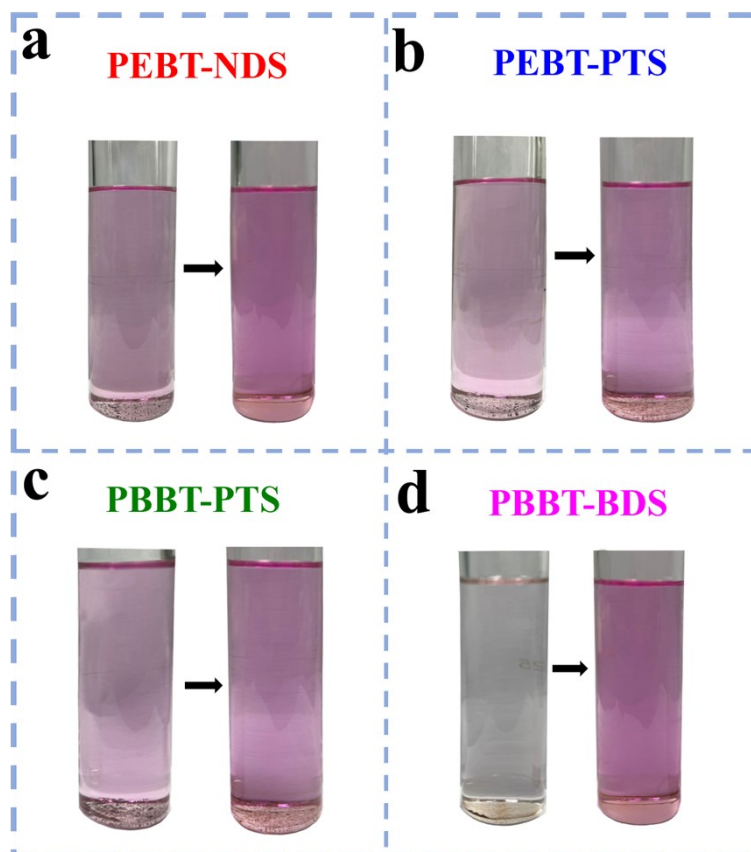

**Figure S12.** Photos of four IOCs before and after iodine release in cyclohexane of (a) PEBT-NDS, (b) PEBT-PTS, (c) PBBT-PTS, (d) PBBT-BDS.

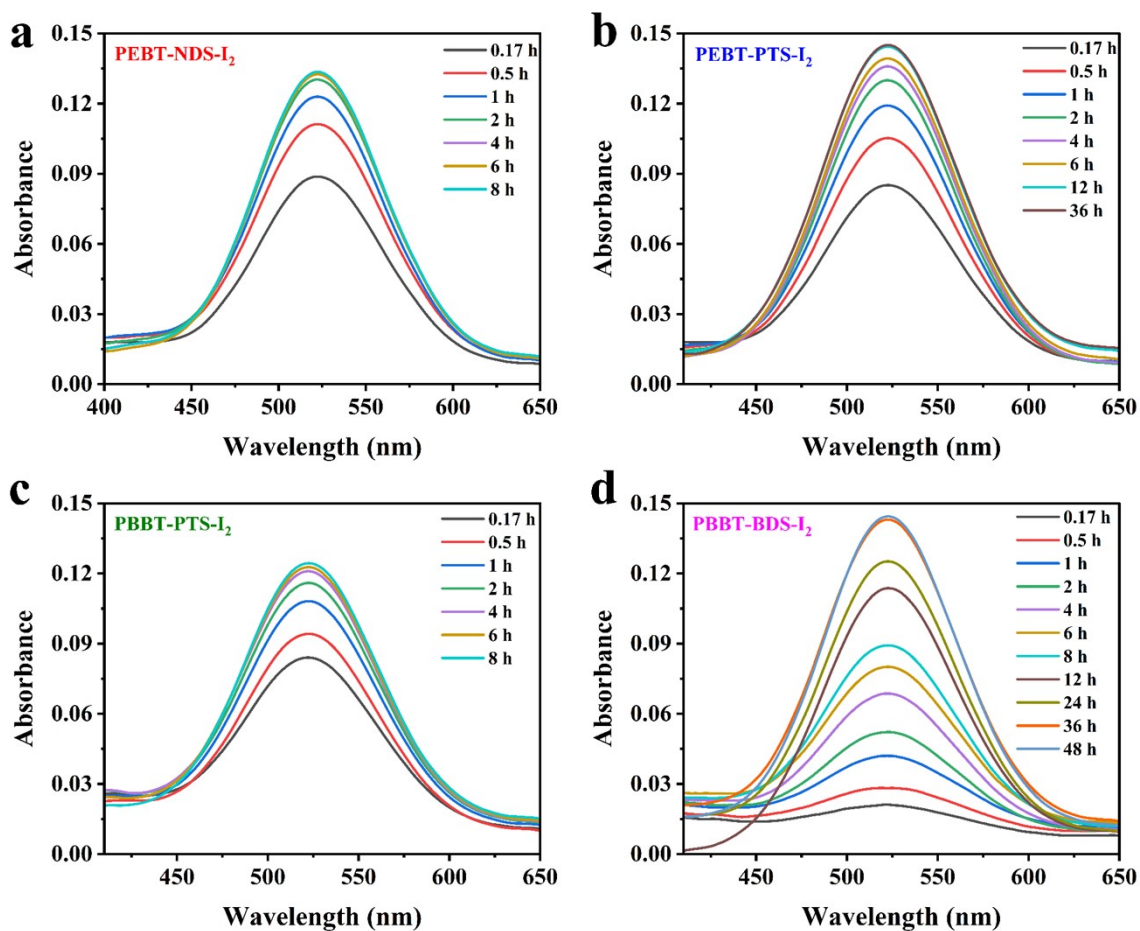

**Figure S13.** UV-Vis absorption curves of release in cyclohexane of (a) PEBT-NDS, (b) PEBT-PTS, (c) PBBT-PTS, (d) PBBT-BDS.

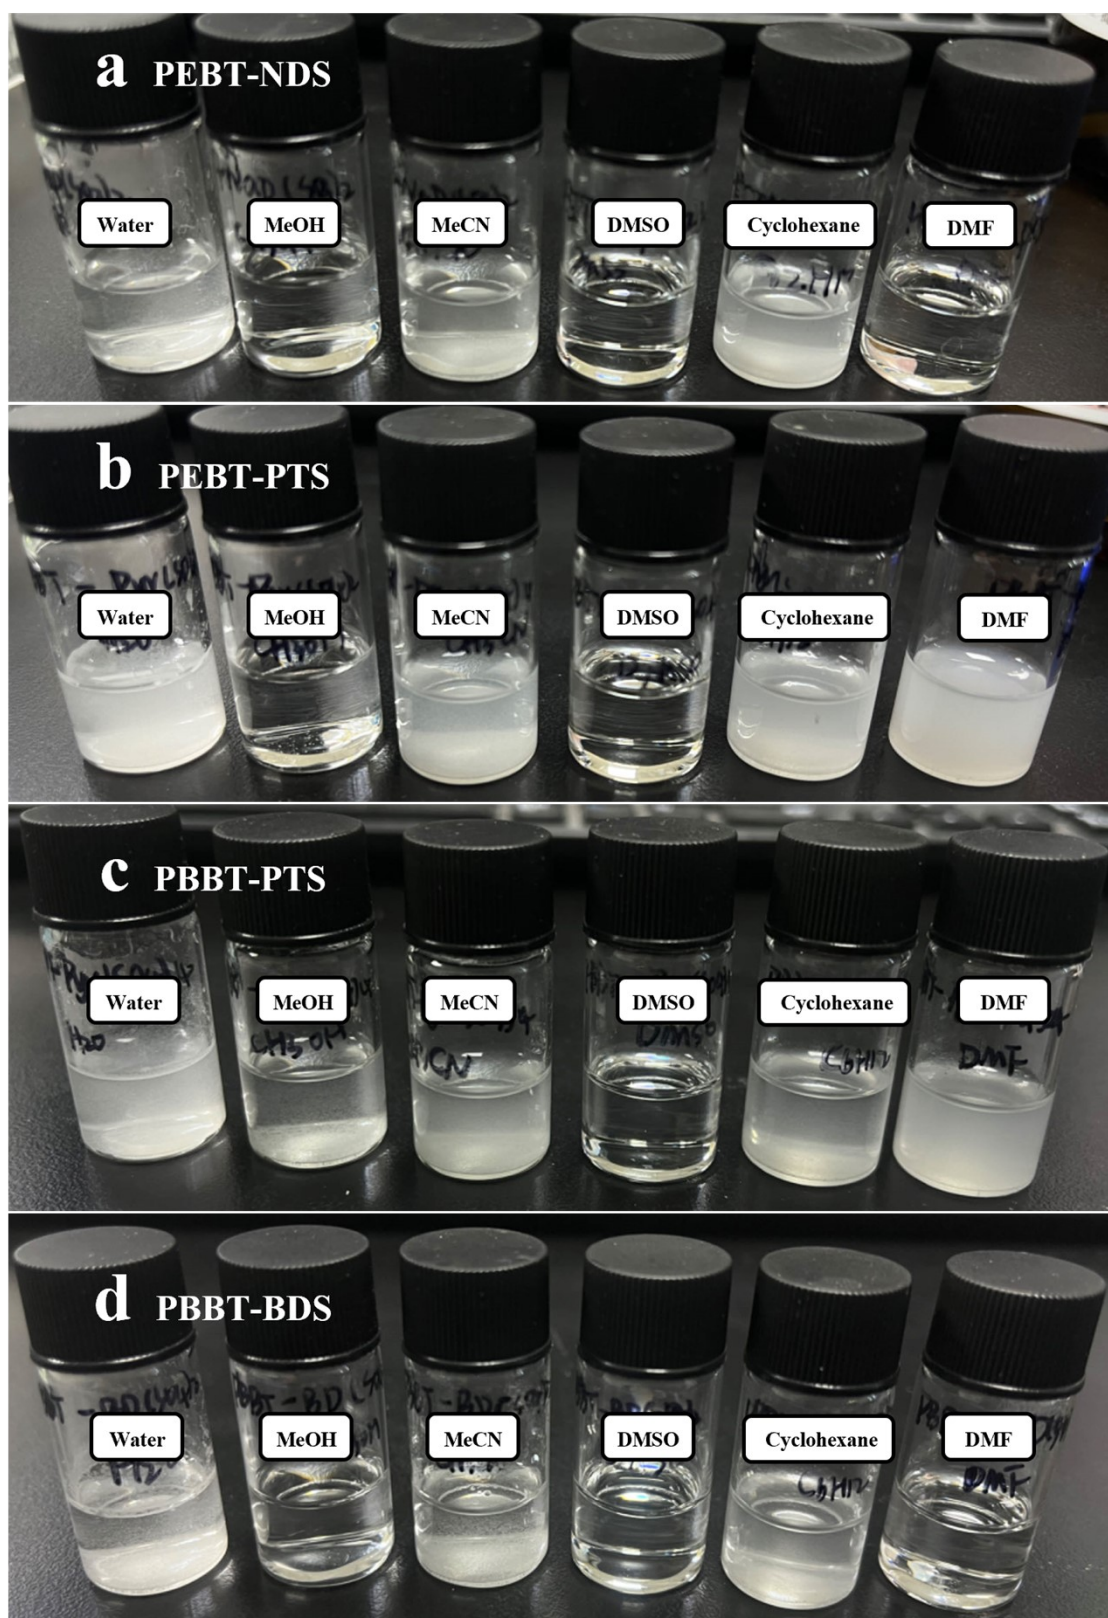

**Figure S14.** Photos of solubility of four IOCs in different solvents at 70 °C.

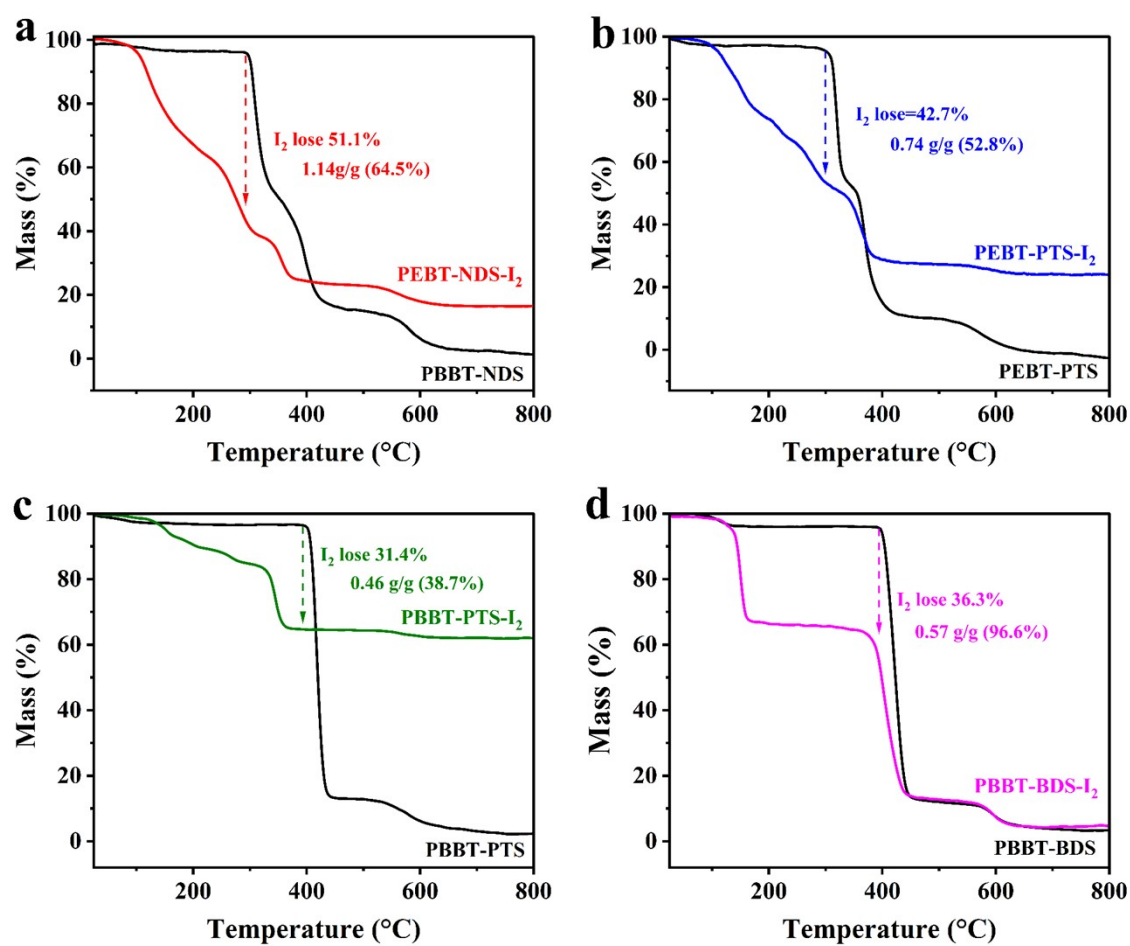

**Figure S15.** TGA curve of four IOCs before and after iodine adsorption of (a) PEBT-NDS, (b) PEBT-PTS, (c) PBBT-PTS, (d) PBBT-BDS.

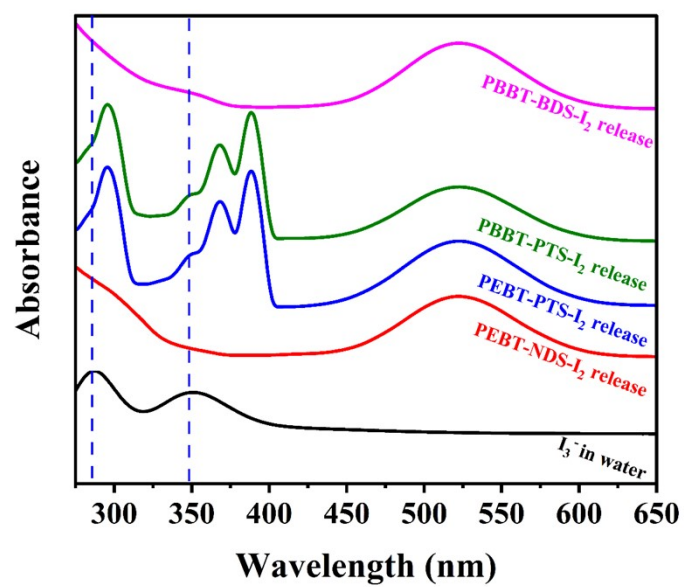

**Figure S16.** UV-Vis absorption curves of four IOCs release in cyclohexane after iodine adsorption and  $I_3^-$  in water.



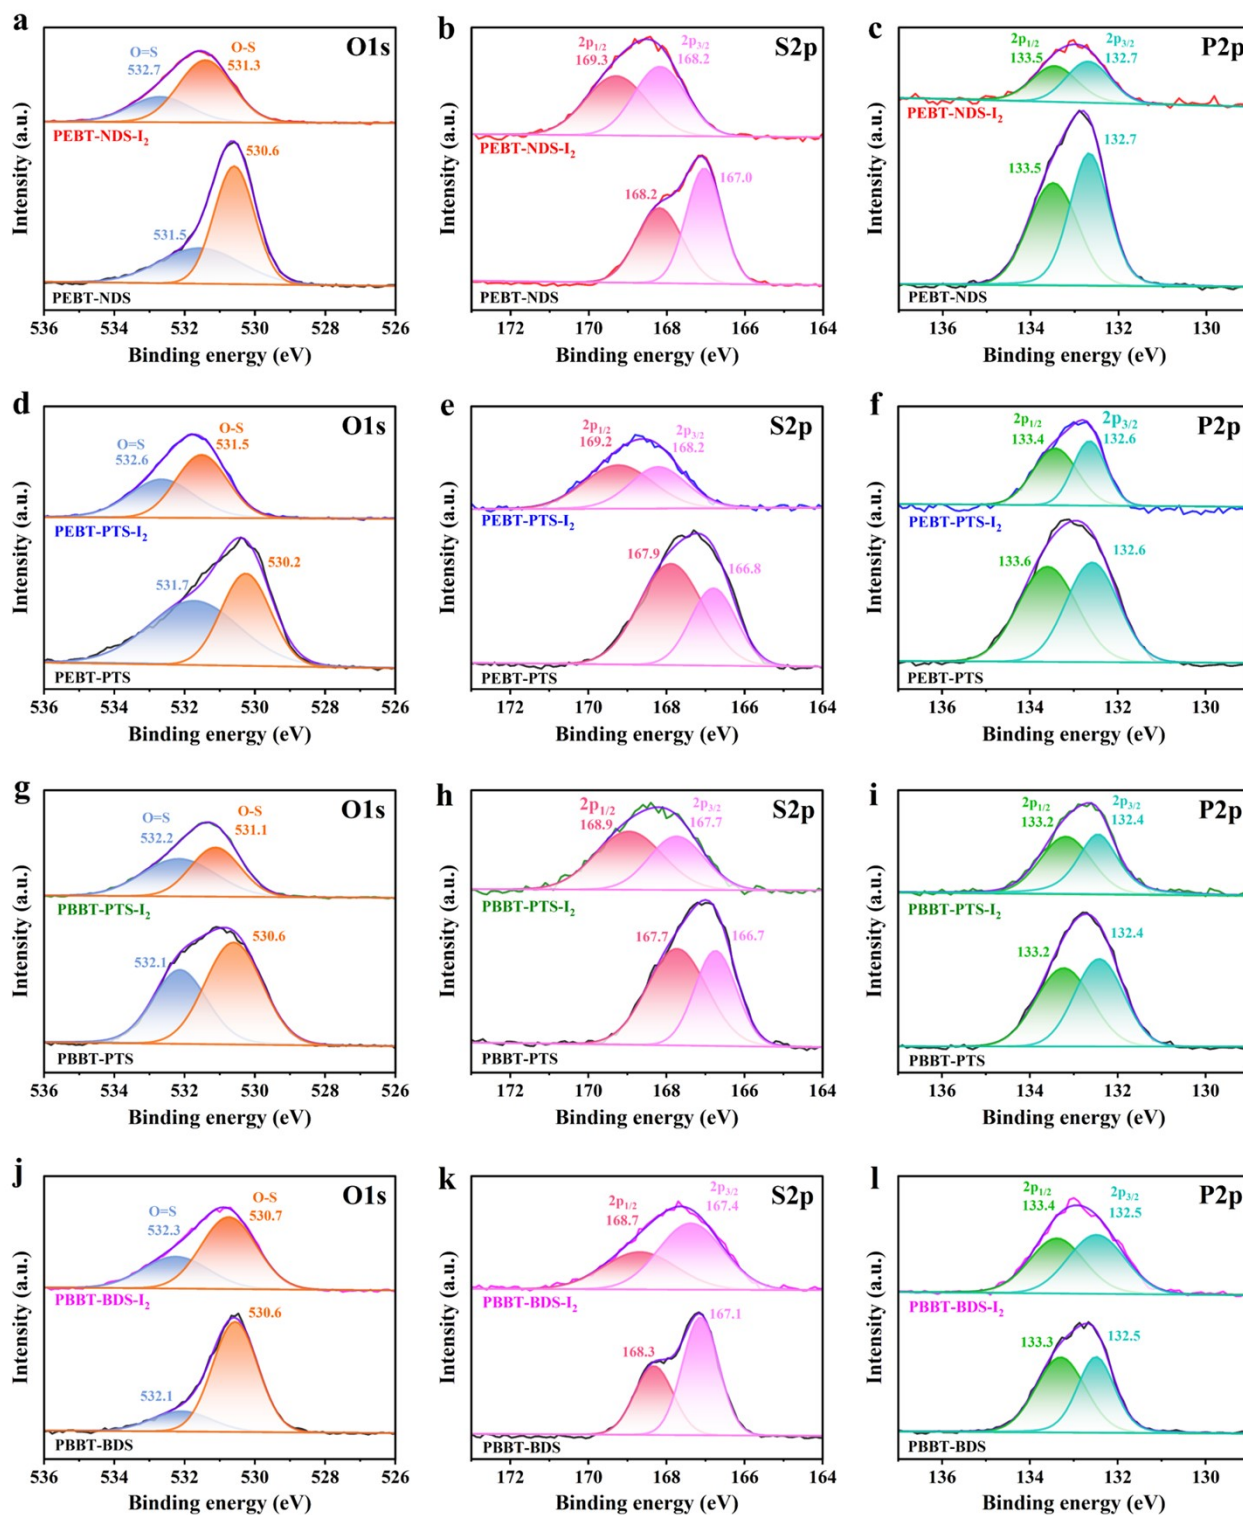

**Figure S17.** XPS high-resolution spectrum of four IOC materials before and after iodine adsorption of (a-c) PEBT-NDS, (d-f) PEBT-PTS, (g-i) PBBT-PTS, (j-l) PBBT-BDS.

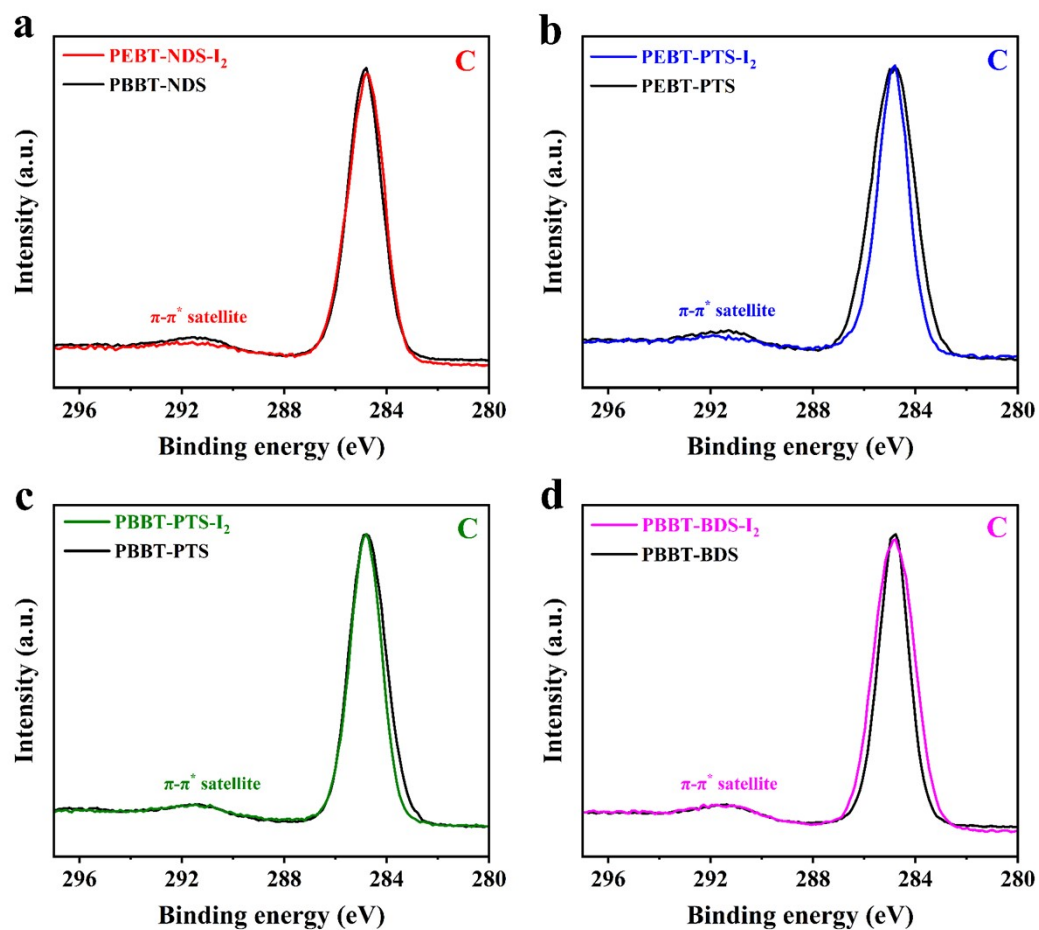

**Figure S18.** XPS C high-resolution spectrum of four IOCs before and after iodine adsorption of (a) PEBT-NDS, (b) PEBT-PTS, (c) PBBT-PTS, (d) PBBT-BDS.



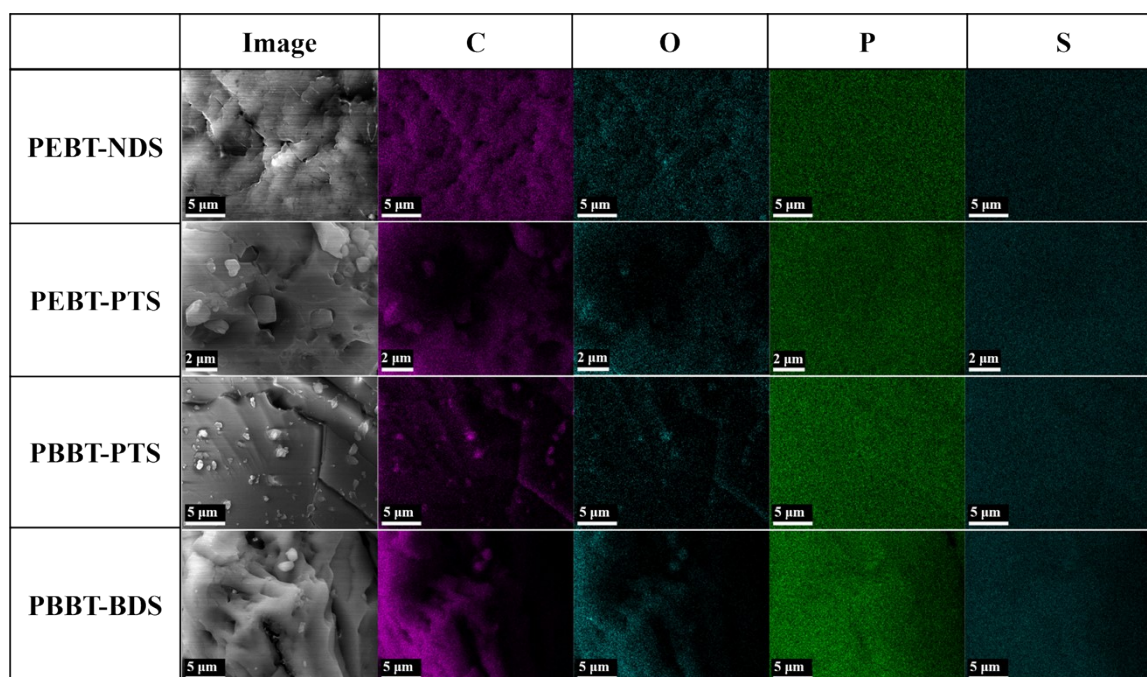

**Figure S19.** Element distribution mapping of four IOCs.

|          | Image                                                                             | C                                                                                 | O                                                                                 | P                                                                                  | S                                                                                   | I                                                                                   |
|----------|-----------------------------------------------------------------------------------|-----------------------------------------------------------------------------------|-----------------------------------------------------------------------------------|------------------------------------------------------------------------------------|-------------------------------------------------------------------------------------|-------------------------------------------------------------------------------------|
| PEBT-NDS | 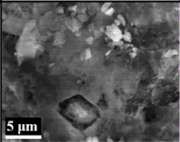 |  |  |  |  |  |
| PEBT-PTS |  |  |  |  |  |  |
| PBBT-PTS |  |  |  |  |  |  |
| PBBT-BDS |  |  |  |  |  |  |

**Figure S20.** Element distribution mapping of four IOCs after iodine adsorption.

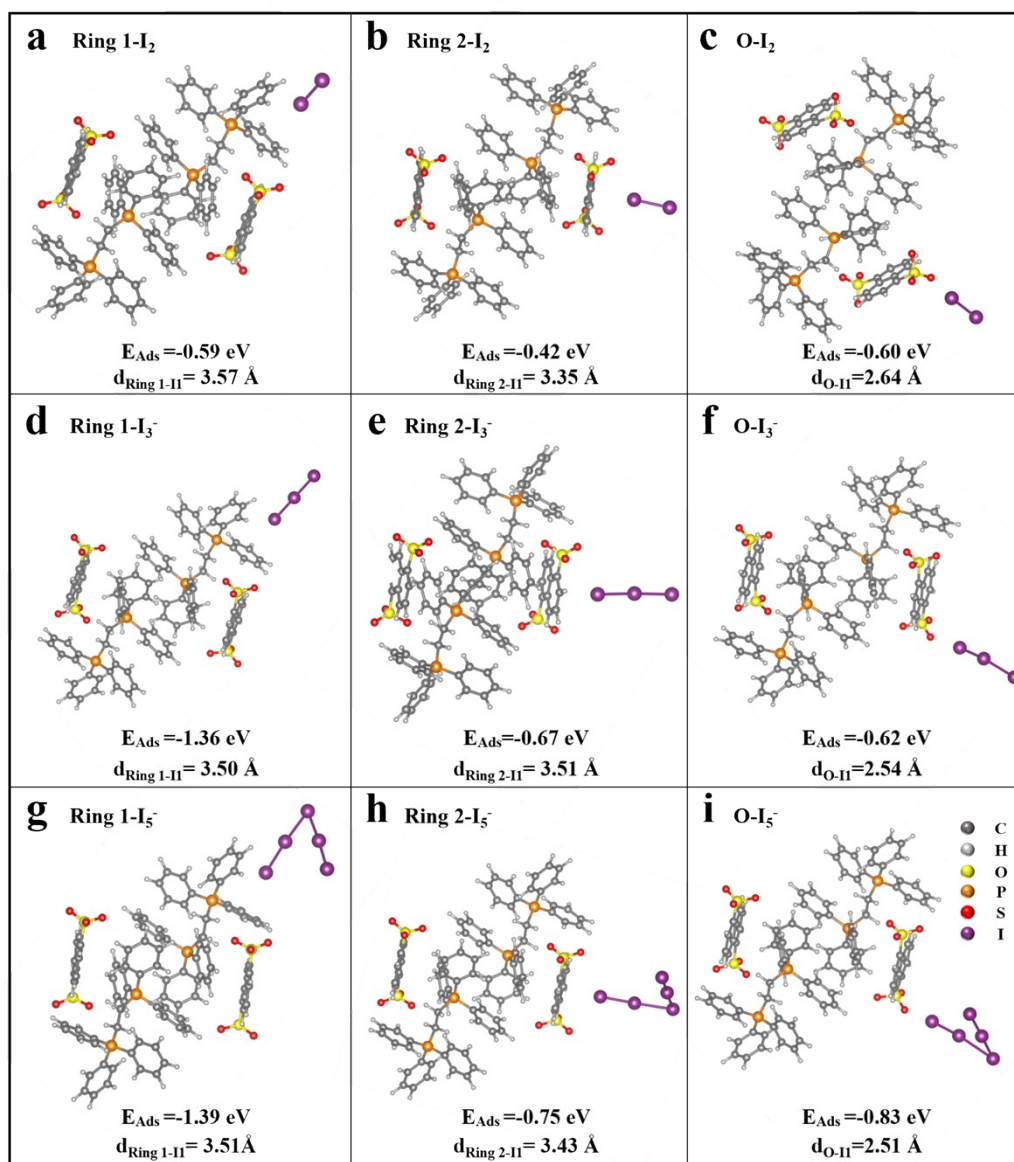

**Figure S21.** The lowest energy configurations, adsorption energies, and distances of (a-c) ring 1 of PEPT, ring 2 and O of NDS on I<sub>2</sub> sites, (d-f) ring 1 of PEPT, ring 2 and O of NDS on I<sub>3</sub><sup>-</sup> sites, (g-h) ring 1 of PEPT, ring 2 and O of NDS on I<sub>5</sub><sup>-</sup> sites.

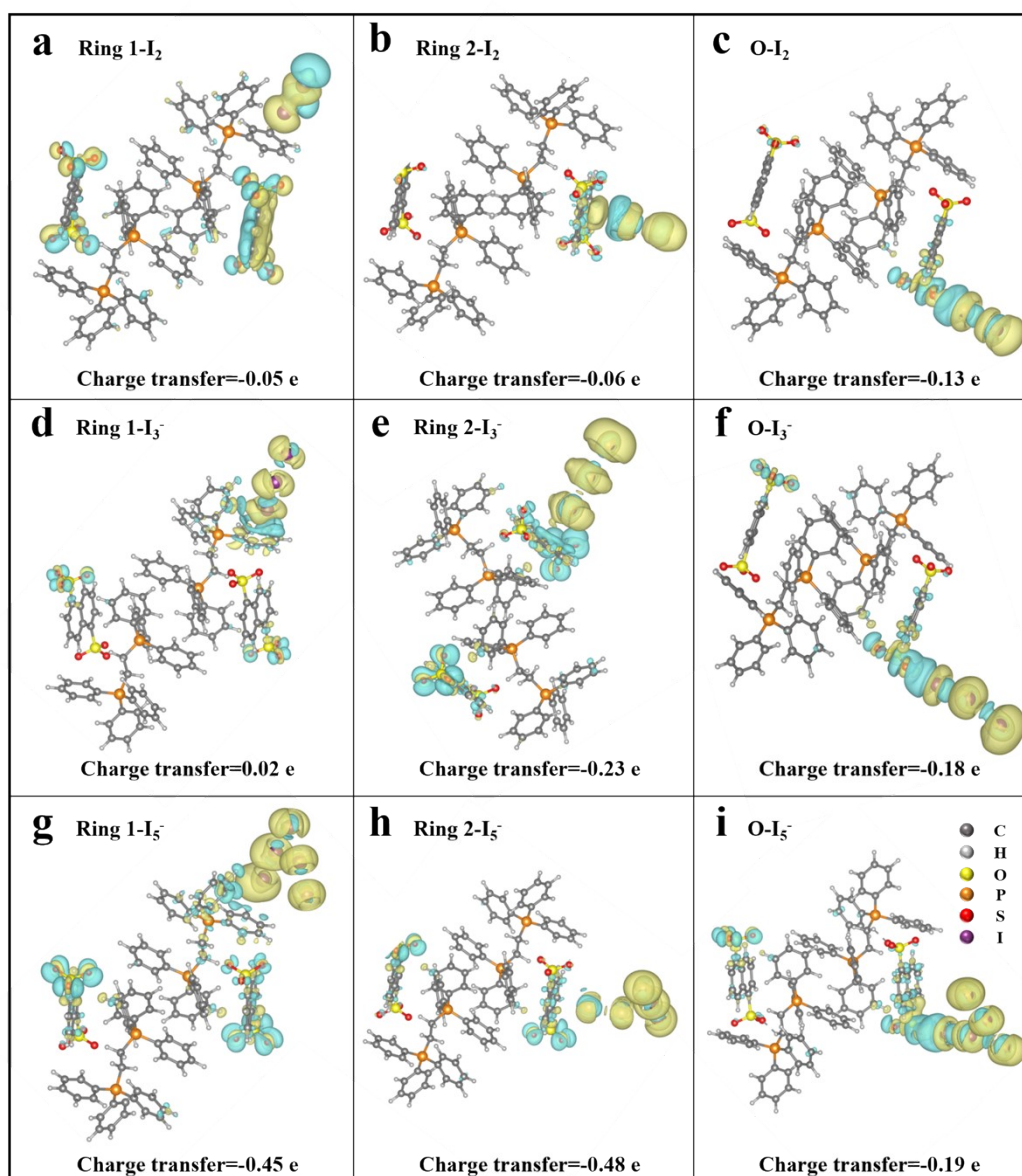

**Figure S22.** Charge transfer diagrams of (a-c) ring 1 of PEBT, ring 2 and O of NDS on I<sub>2</sub> sites, (d-f) ring 1 of PEBT, ring 2, and O of NDS on I<sub>3</sub><sup>-</sup> sites, (g-h) ring 1, ring 2, and O of NDS on I<sub>5</sub><sup>-</sup> sites.

**Table S1.** Preparation parameters of four IOCs.

| Monomer structural formula                                                        | Name of single crystal | Cationic monomer and dosage | Anionic monomer and dosage | Morphology           |
|-----------------------------------------------------------------------------------|------------------------|-----------------------------|----------------------------|----------------------|
| 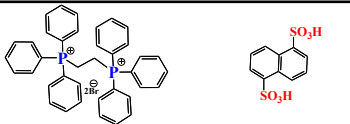 | PEBT-NDS               | PEBT<br>(0.1 mmol)          | NDS<br>(0.1 mmol)          | Colourless rhombus   |
|  | PEBT-PTS               | PEBT<br>(0.1 mmol)          | PTS<br>(0.05 mmol)         | Pale yellow quadrate |
|  | PBBT-PTS               | PBBT<br>(0.1 mmol)          | PTS<br>(0.05 mmol)         | Pale yellow hexagon  |
|  | PBBT-BDS               | PBBT<br>(0.1 mmol)          | BDS<br>(0.1 mmol)          | Colorless rod        |

**Table S2.** Unit cell packing of four IOCs.

| Single crystal | a       | b       | c       | $\alpha$ | $\beta$ | $\gamma$ | Volume | Crystal system    | Point group | Space group |
|----------------|---------|---------|---------|----------|---------|----------|--------|-------------------|-------------|-------------|
| PEBT-NDS       | 9.2113  | 13.5991 | 17.3584 | 98.176   | 93.192  | 106.950  | 2047.9 | Triclinic system  | $\bar{1}$   | $P\bar{1}$  |
| PEBT-PTS       | 11.9946 | 20.2180 | 17.2493 | 90       | 99.561  | 90       | 4125.0 | Monoclinic system | 2/m         | $P2_1/n$    |
| PBBT-PTS       | 13.4375 | 19.787  | 18.4255 | 90       | 106.827 | 90       | 4689.4 | Monoclinic system | 2/m         | $P2_1/n$    |
| PBBT-BDS       | 10.5835 | 14.1726 | 17.216  | 70.458   | 77.061  | 71.936   | 2292.7 | Triclinic system  | $\bar{1}$   | $P\bar{1}$  |

**Table S3.** Plane angle of benzene rings of PEBT and PBBT in four IOCs.

| Plane angle      | ∠Ring 1 | ∠Ring 1 | ∠Ring 2 | ∠Ring 4 | ∠Ring 4 | ∠Ring 5 |
|------------------|---------|---------|---------|---------|---------|---------|
|                  | &Ring 2 | &Ring 3 | &Ring 3 | &Ring 5 | &Ring 6 | &Ring 6 |
| PEBT in PEBT-NDS | 63.04°  | 69.35°  | 87.68°  | 57.90°  | 66.29°  | 73.19°  |
| PEBT in PEBT-PTS | 77.92°  | 76.92°  | 58.14°  | 57.52°  | 78.67°  | 63.55°  |
| PBBT in PBBT-PTS | 73.77°  | 67.45°  | 60.34°  | 79.88°  | 60.40°  | 79.18°  |
| PBBT in PBBT-BDS | 84.42°  | 83.72°  | 60.75°  | 50.98°  | 85.26°  | 62.95°  |

**Table S4.** Solubleness of four IOCs in different solvents at 70 °C.

|          | Water | MeOH | MeCN | DMSO | Cyclohexan<br>e | DMF |
|----------|-------|------|------|------|-----------------|-----|
| PEBT-NDS | ×     | √    | ×    | √    | ×               | √   |
| PEBT-PTS | ×     | √    | ×    | √    | ×               | ×   |
| PBBT-PTS | ×     | ×    | ×    | √    | ×               | ×   |
| PBBT-BDS | ×     | √    | ×    | √    | ×               | √   |



**Table S5.** EDS data of four IOCs.

| Atomic (%) | PEBT-NDS | PEBT-PTS | PBBT-PTS | PBBT-BDS |
|------------|----------|----------|----------|----------|
| C K        | 81.91    | 82.80    | 81.31    | 84.57    |
| O K        | 12.43    | 9.23     | 6.24     | 9.23     |
| P K        | 2.99     | 4.26     | 6.58     | 3.36     |
| S K        | 2.67     | 3.70     | 5.87     | 2.83     |

**Table S6.** EDS data of four IOCs after iodine adsorption.

| Atomic (%) | PEBT-NDS | PEBT-PTS | PBBT-PTS | PBBT-BDS |
|------------|----------|----------|----------|----------|
| C K        | 79.73    | 74.37    | 79.62    | 83.11    |
| O K        | 6.02     | 11.88    | 7.65     | 9.18     |
| P K        | 4.46     | 3.28     | 3.66     | 3.04     |
| S K        | 3.65     | 4.28     | 2.80     | 2.53     |
| I L        | 6.15     | 6.18     | 6.27     | 2.15     |

**Table S7.** The distance between iodine atoms.

| Site   | I <sub>2</sub> | I <sub>3</sub> <sup>-</sup> |       | I <sub>5</sub> <sup>-</sup> |       |       |       |
|--------|----------------|-----------------------------|-------|-----------------------------|-------|-------|-------|
|        | I1-I2          | I1-I2                       | I2-I3 | I1-I2                       | I2-I3 | I3-I4 | I4-I5 |
| Ring 1 | 2.80           | 2.93                        | 2.89  | 2.85                        | 3.02  | 3.08  | 2.80  |
| Ring 2 | 2.69           | 2.85                        | 2.91  | 2.76                        | 3.09  | 3.04  | 2.82  |
| O      | 2.75           | 2.82                        | 2.96  | 2.74                        | 3.74  | 2.98  | 2.85  |

**Table S8.** Comparison with other reported iodine vapor adsorption properties and synthesis conditions.

| Adsorbent <sup>[a]</sup> | Adsorption capacity of iodine vapor (g g <sup>-1</sup> ) | Adsorption temperature (°C) | Adsorption time (h) | Synthesis temperature <sup>[b]</sup> | Reaction time | Ref.      |
|--------------------------|----------------------------------------------------------|-----------------------------|---------------------|--------------------------------------|---------------|-----------|
| PEBT-NDS                 | 1.62                                                     | 70                          | 144                 | RT                                   | 12 h          | This work |
| BPy-Cage                 | 3.23                                                     | 75                          | 14                  | RT                                   | 12 h          | [10]      |
| Etp6β                    | 0.25                                                     | 85                          | 1                   | RT                                   | 12 h          | [46]      |
| COF-TpgBD                | 1.81                                                     | 125                         | ~3 d                | 7 °C                                 | 72 h          | [54]      |
| NACs-TPAPyH              | 1.27                                                     | 70                          | 20                  | RT                                   | -             | [55]      |
| UiO-66-NH-TD             | 1.33                                                     | 75                          | 2.5                 | 120 °C                               | 24 h          | [56]      |
| COFs@cotton              | 0.53                                                     | 77                          | 7                   | RT                                   | -             | [57]      |
| BPy-Box·4Cl              | 3.99                                                     | 75                          | ~15                 | Methanol reflux                      | 96 h          | [58]      |
| TJNU-203                 | 5.885                                                    | 77                          | 120                 | 120 °C                               | 72 h          | [59]      |
| SCU-SnS                  | 6.12                                                     | 75                          | 120                 | 180 °C                               | 96 h          | [60]      |

<sup>[a]</sup> BPy-Cage: bipyridine-based nonporous adaptive cage; Etp6β: *per*-ethylated pillar[6]arene; COF: Covalent organic framework, Tpg: 2,4,6-Trihydroxylbenzene-1,3,5-tricarbaldehyde, BD: benzidine; NACs-TPAPyH: 4-(4-(diphenylamino)phenyl)pyridin-1-ium chloride; UiO-66-NH<sub>2</sub>: from ZrCl<sub>4</sub> and 2-aminoterephthalic acid; COF: from 1,3,5-tris(4-aminophenyl)benzene and terephthalaldehyde; BPy-Box·4Cl: a tetracationic cyclophane composed of two 3,3'-bipyridinium units linked together by two *p*-xylylene bridges; TJNU-203: 2D COF from 1,3,5-trimethyl-2,4,6-tris(4-aminophenyl) benzene (TMTAPB) and terephthalaldehyde (TPA); SCU-SnS: A metal-sulfide framework ((NH<sub>4</sub>)<sub>2</sub>(Sn<sub>3</sub>S<sub>7</sub>)).

<sup>[b]</sup> RT: Room temperature.

## References

1. E. D. Revellame, D. L. Fortela, W. Sharp, R. Hernandez and M. E. Zappi, Adsorption kinetic modeling using pseudo-first order and pseudo-second order rate laws: A review, *Clean Eng. Technol.*, 2020, **1**, 100032.
2. Y. Gao, Y. Huo, M. Chen, X. Su, J. Zhan, L. Wang, F. Liu, J. Zhu, Y. Zeng, J. Fan, Z. Li, R. Chen and H.-L. Wang, Phenolic based porous carbon fibers with superior surface area and adsorption efficiency for radioactive protection, *Adv. Fiber Mater.*, 2023, **5**, 1431-1446.
3. G. Kresse and J. Furthmüller, Efficient iterative schemes for ab initio total-energy calculations using a plane-wave basis set, *Phys. Rev. B*, 1996, **54**, 11169-11186.
4. G. Kresse and J. Furthmüller, Efficiency of ab-initio total energy calculations for metals and semiconductors using a plane-wave basis set, *Comp. Mater. Sci.*, 1996, **6**, 15-50.
5. G. Kresse and J. Hafner, Ab initio molecular dynamics for liquid metals, *Phys. Rev. B*, 1993, **47**, 558-561.
6. J. P. Perdew, K. Burke and M. Ernzerhof, Generalized gradient approximation made simple, *Phys. Rev. Lett.*, 1996, **77**, 3865-3868.
7. S. Grimme, J. Antony, S. Ehrlich and H. Krieg, A consistent and accurate ab initio parametrization of density functional dispersion correction (DFT-D) for the 94 elements H-Pu, *J. Chem. Phys.*, 2010, **132**.
8. S. Grimme, S. Ehrlich and L. Goerigk, Effect of the damping function in dispersion corrected density functional theory, *J. Comput. Chem.*, 2011, **32**, 1456-1465.
9. G. Henkelman, A. Arnaldsson and H. Jonsson, A fast and robust algorithm for Bader decomposition of charge density, *Comp. Mater. Sci.*, 2006, **36**, 354-360.
